# 1 Characterisation of factors contributing to the performance of 2 nonwoven fibrous matrices as substrates for adenovirus vectored 3 vaccine stabilisation

## 4 Authors

5 Pawan Dulal<sup>1\*</sup>, Adam A Walters<sup>1</sup>, Nicholas Hawkins<sup>2</sup>, Tim DW Claridge<sup>3</sup>, Katarzyna Kowal<sup>4</sup>, Steven  
6 Neill<sup>4</sup>, Stephen J Russell<sup>4</sup>, Adam Ritchie, Rebecca Ashfield<sup>1</sup>, Adrian VS Hill<sup>1</sup>, Alexander D Douglas<sup>1\*</sup>

7 \*Corresponding authors: [pawan.dulal@ndm.ox.ac.uk](mailto:pawan.dulal@ndm.ox.ac.uk); [sandy.douglas@ndm.ox.ac.uk](mailto:sandy.douglas@ndm.ox.ac.uk)

## 8 Affiliations

- 9 1. Jenner Institute, University of Oxford, Wellcome Trust Centre for Human Genetics, Roosevelt  
10 Drive, Oxford, OX3 7BN, United Kingdom
- 11 2. Oxford Silk Group, ABRG, Department of Zoology, University of Oxford, OX2 3RE, United  
12 Kingdom
- 13 3. Department of Chemistry, University of Oxford, Chemistry Research Laboratory, Mansfield  
14 Road, Oxford, OX1 3TA, United Kingdom
- 15 4. Nonwovens Innovation & Research Institute Ltd, 169 Meanwood Road, Leeds, LS7 1SR, UK

## 16 Author contributions

17 Conceptualization, funding acquisition, project administration, supervision: PD, AAW, ADD, SJR, AR,  
18 RA, AVSH; Investigation: PD, NH, TDWC, KK; Writing- original: PD, ADD; Writing- review and editing:  
19 All

## 20 Acknowledgments

21 We are grateful for the assistance of the Jenner Institute Viral Vector Core Facility in the production  
22 and immunostaining of adenoviruses, to Pall Corporation, GE Healthcare and Hollingsworth-Vose for  
23 providing filter media and technical discussion and to Dr. Isaac Rubens Martínez Pardo from RMIT  
24 University, Australia for his assistance in FTIR data analysis

## 25 Funding

26 This work was supported by the UK Medical Research Council (grants MR/P017339/1 and  
27 MC\_PC\_15040), the UK Biotechnology and Biological Sciences Research Council (BB/M019152/1),  
28 and the UK Engineering and Physical Sciences Research Council (grant EP/R013756/1). ADD is  
29 supported by the Wellcome Trust (grant 201477/Z/16/Z) and is a Jenner Investigator. AVSH is  
30 supported by a Wellcome Trust investigator award (104750/Z/14)) and is a Jenner Investigator. The  
31 funders had no role in study design, data collection and analysis, decision to publish, or preparation  
32 of the manuscript.

## 33 Competing interests

34 AVSH and ADD are named inventors on patents relating to adenovirus-vectored vaccines.

35

## 36 Abstract

37 The global network of fridges and freezers known as the “cold chain” can account for a significant  
38 proportion of the total cost of vaccination and is susceptible to failure. Cost-efficient techniques to  
39 enhance stability of vaccines could prevent such losses and improve vaccination coverage,  
40 particularly in low income countries. We have previously reported a novel, potentially less expensive  
41 thermostabilisation approach using a combination of simple sugars and glass micro-fibrous matrix,  
42 achieving an excellent recovery of vaccines after storage at supraphysiological temperatures. This  
43 matrix is, however, prone to fragmentation and currently not suitable for clinical translation.

44 Here, we report an investigation of alternative, potentially GMP compatible, fibrous matrices. A  
45 number of commercially-available matrices permitted good protein recovery, quality of sugar glass  
46 and moisture content of the dried product but did not achieve the thermostabilisation performance  
47 of the original glass fibre matrix. We therefore further investigated physical and chemical  
48 characteristics of the glass fibre matrix and its components. Our investigation shows that the  
49 polyvinyl alcohol present in the glass fibre matrix assists vaccine stability. This finding enabled us to  
50 develop a custom-produced matrix with encouraging performance, as an initial step towards a  
51 biocompatible matrix for clinical translation. We discuss the path to transfer of the technology into  
52 clinical use, including potential obstacles.

53

## 54 Introduction

55 Vaccine immunogens are composed of complex biological macromolecules. Good immunogenicity  
56 requires stability of these molecules throughout the lifespan of a product, from production and  
57 formulation, through transportation and storage to delivery to the recipient. Extrinsic factors such  
58 as light, pH, agitation and oxidants combine with temperature fluctuations to challenge product  
59 stability. Therefore, most vaccines need to be continuously stored in fridges or freezers. Maintaining  
60 the cold chain and associated logistics in vaccination campaigns can contribute up to 45% of the  
61 total cost of vaccination <sup>1</sup>. On the other hand, damage as a result of cold chain breakages costs  
62 several million dollars annually <sup>2</sup>. These issues affect not only low income countries, where the cold  
63 chain is regarded as being least reliable, but also developed countries <sup>3 4 5</sup>. The vaccines responsible  
64 for eradication of smallpox and rinderpest (the only two diseases eradicated by immunisation) were  
65 both thermostable, a factor believed to contribute to their success <sup>6</sup>. Development of technologies  
66 to enhance vaccine thermostability has therefore been a major focus of research effort <sup>7</sup>.

67 Viral vectored vaccines, in particular adenoviruses, are versatile platforms for development of novel  
68 vaccines against malaria <sup>8 9</sup>, HIV -AIDS <sup>10 11</sup>, tuberculosis <sup>12</sup> and influenza <sup>13 14</sup>. They have provided one  
69 of the leading approaches to control of the recent Ebola epidemics, and the speed of producing new  
70 vaccines using a generic manufacturing process makes them attractive for emergency response to  
71 other outbreak pathogens <sup>15,16</sup>. Successful thermostabilisation of adenovirus vectored vaccines could  
72 thus be valuable for products targeting a wide range of diseases.

73 There have been a number of efforts to enhance stability of adenovirus-based vaccines in liquid  
74 formulation <sup>17-19</sup>. Other groups have reported improvement in stability by drying vaccines using  
75 lyophilisation <sup>20,21</sup>, spray drying <sup>22-24</sup>, and nano-patch technology <sup>25</sup>. We have previously reported that  
76 drying a formulation of adenovirus in glass forming sugars upon a fibrous matrix such as paper or a  
77 wetlaid nonwoven fabric permitted full recovery of viable and immunogenic virus, even after six  
78 months at 45°C <sup>26-28</sup>. We refer to this method as sugar-matrix thermostabilisation (SMT). As well as

79 thermostabilisation performance, advantages of SMT include a relatively short process duration (in  
80 some cases as little as 18 hours) and avoidance of the stress of extreme in-process temperature  
81 exposure involved in lyophilisation and spray drying.

82 Our previous published SMT work used a glass fibre matrix and a polypropylene matrix; we reported  
83 that the glass fibre matrix achieved better stability than the polypropylene matrix <sup>26</sup>. Glass fibre  
84 matrix is however prone to shedding of non-biocompatible fibres, and so not suitable for clinical  
85 translation. Here, we present results from an effort to characterise the factors contributing to the  
86 performance of glass fibre matrix and to test alternative matrices more suitable for clinical use.

87

## 88 Methods

### 89 Viruses and infectivity titration

90 Simian adeno virus vectors ChAd63-METRAP and ChAdOx2-RabGP were prepared, purified and  
91 tested for quality by the Jenner Institute Viral Vector Core Facility, as previously described <sup>28,29</sup>.

92 Viruses were dialysed against either a previously used storage buffer (10mM Tris, 7.5 % w/v sucrose,  
93 pH 7.8) or unbuffered 0.5M trehalose and sucrose and stored at -80°C as stock. Typical preparations  
94 were supplied and stored at a titre of c.  $1 \times 10^{12}$  virus particles (VP) per mL, corresponding to c.  $1 \times 10^{10}$   
95 infectious units (IU) per mL and hence a particle: infectivity ratio of c. 100.

96 For infectivity titration, duplicate fivefold serial dilutions were prepared in complete DMEM (10%  
97 FCS, 100 U penicillin, 0.1 mg streptomycin/ml, 4 mM L-glutamine) and used to infect 80-100 %  
98 confluent HEK293-TREx cells (ThermoFisher) grown in 96-well plates (BD Purecoat Amine, BD  
99 Biosciences, Europe). Infected cells were immunostained and imaged as previously described <sup>30</sup>.  
100 Wells containing 20-200 spots were used to back-calculate recovered infectious units.

101

### 102 Drying, thermochallenge and reconstitution

103 Stock vaccines were thawed and diluted into unbuffered 0.5M trehalose – sucrose solution. Dilution  
104 factors, final viral titres, and the trehalose: sucrose ratio varied between experiments, as stated in  
105 figure legends.

106 Fibrous matrix was cut into 100 mm<sup>2</sup> pieces, loaded with vaccine formulation and transferred to a  
107 glove box (Coy Laboratory Products). An activated silica bed within the chamber and circulation of  
108 air through desiccation capsules containing anhydrous calcium sulphate (Drierite™, W.A. Hammond  
109 Drierite Co.), regulated by a humidity controller (Series 5000, Electro-tech Systems), was used to  
110 maintain relative humidity beneath 5%. A portable datalogger (AET-175, ATP instruments) was used  
111 for recording changes in relative humidity and temperature during the desiccation process. The  
112 temperature inside the enclosed glove box remained between 22°C and 25°C for all experiments.

113 Samples were transferred into 2 mL glass vials, stoppered and crimp sealed under dry conditions  
114 within the glove box prior to further use. Samples undergoing thermochallenge i.e. storage at  
115 elevated temperature (typically 45°C for one or four weeks) were stored within secondary packaging  
116 (moisture barrier bags).

117 For experiments involving reconstitution of dried samples, this was performed by addition of  
118 phosphate buffered saline (Sigma), followed by brief vortexing of the vial (1±0.5 seconds, three  
119 times). Virus infectivity after reconstitution was assayed as described above. Recovery of infectious  
120 virus was quantified by comparison to a sample of the starting material, included on the same assay  
121 plate. Between the set-up of an experiment and the assay of recovered infectivity, such comparator  
122 material was stored at -80°C in aqueous buffer (under which conditions loss of infectivity is known to  
123 be negligible).

124 Recovery was calculated in terms of log<sub>10</sub>-fold loss in the total infectious virus content of the matrix  
125 i.e. log<sub>10</sub>-fold loss = log<sub>10</sub>(infectious units dried on matrix based on -80 stored sample) –  
126 log<sub>10</sub>(infectious units recovered from matrix). Unlike viral titres (infectious units / mL), this  
127 parameter is independent of the volumes in which sample was dried or reconstituted. 0.3 log<sub>10</sub>-fold  
128 loss thus implies c. 50% recovery, 0.5 log<sub>10</sub>-fold loss implies c. 30% recovery, and 1 log<sub>10</sub>-fold loss  
129 implies 10% recovery.

130

### 131 [Karl Fischer moisture analysis](#)

132 Residual moisture content in single matrix post-desiccation was determined with a Karl Fischer  
133 moisture analyser equipped with coulometer (Metrohm), and Hydranal-Coulomat titration solution  
134 (Honeywell, Fluka) in accordance with the manufacturers' recommendations. A standard was used  
135 to calibrate the instrument performance (lactose standard 5%, MerckMillipore). Residual moisture  
136 content was expressed as the mass extracted per 50 µL of formulation loaded into each matrix.

## 137 Measurement of subvisible particles

138 100 mm<sup>2</sup> pieces of glass fibre (S14) were cut, autoclaved at (121 °C, 15 minutes) and loaded with 50  
139 µL of sugar solution prior to drying in the glove box, vialling and reconstitution as described above.  
140 Reconstituted solution from 10 vials was aspirated using a syringe with a conventional 20G needle  
141 (BD Biosciences), to produce a single pooled unfiltered sample. Reconstituted solution from a  
142 further 10 vials was aspirated using a 5-micron filter needle (BD Biosciences), to produce a single  
143 pooled filtered sample. Both pools were diluted to a final volume of 25 mL and tested for sub-visible  
144 particles by light microscopy according to Ph.Eur (2.9.19) / USP <788> by a commercial testing  
145 laboratory (Reading Scientific Services Limited).

146

## 147 Scanning electron microscopy

148 Untreated matrices (i.e. without sputter coating) were loaded onto aluminium mounts using carbon  
149 conductive tabs and imaged using a Zeiss-Evo LS15 variable pressure scanning electron microscope  
150 (SEM) equipped with variable pressure secondary electron detector (Carl Zeiss Ltd). Imaging was  
151 performed at a chamber pressure of 50 Pa air and accelerating voltage of 15 kV. Further analyses of  
152 images such as measurement of fibre diameter were made using Image J software. At least 40  
153 measurements per matrix were performed, using images taken at varying magnification.

154

## 155 Differential scanning calorimetry

156 The glass transition temperature ( $T_g$ ) of sugar glass in matrices was measured immediately after  
157 drying had completed using Differential Scanning Calorimetry (DSC). The melting point of the binder  
158 in untreated glass fibre (S14) was measured using DSC (Q2000, TA instruments). The instrument was  
159 purged with dry nitrogen (50 mg/mL) continuously during sample measurement. Calibration was  
160 performed prior to measurements using a certified reference material (Indium) for temperature and  
161 heat flow accuracy.



162 Multiple 6-millimetre diameter discs were cut out of a matrix dried with 0.5M trehalose: sucrose  
163 (50:50). Discs were weighed and, for each matrix type in turn, a total mass of 5-15 milligrams was  
164 loaded into Aluminium DSC pans (TA Instruments) and hermetically sealed. Samples were subjected  
165 to a temperature ramp from -20 °C to 180 °C at a heating rate of 10 °C per minute. Measurements  
166 on all samples were performed in duplicates. Thermograms relating heat flow (W/g) to temperature  
167 (°C) were analysed using Trios software (TA Instruments) for identification of the glass transition (T<sub>g</sub>)  
168 onset temperature.

169 For the measurement of enthalpic recovery, which manifests as an endothermic peak at the glass  
170 transition, modulated DSC (temperature modulation  $\pm 0.50^{\circ}\text{C}$  every 60 seconds and ramp rate  
171  $3^{\circ}\text{C}/\text{min}$  from  $-20^{\circ}\text{C}$  to  $100^{\circ}\text{C}$ ) was employed. The enthalpic recovery was estimated by linear peak  
172 integration in the thermograms plotted between nonreverse heat flow (W/g) and temperature (°C)  
173 using Universal Analysis software (TA Instruments).

174

## 175 Protein recovery

176 A 10mg/mL solution of lysozyme (Sigma-Aldrich) was made in 0.5M trehalose sucrose. 25  $\mu\text{L}$  was  
177 loaded into each matrix in triplicates. Protein was reconstituted from the matrices after desiccation  
178 overnight and recovery was quantified using EnzChek Lysozyme Assay Kit (ThermoFisher Scientific).  
179 Fluorescence measurements were performed in triplicates for each sample and protein recovery  
180 calculated by interpolation on a standard curve, using GraphPad Prism.

181

## 182 Thermogravimetric analysis

183 Degradation temperatures of matrix constituents were measured by thermogravimetric analysis  
184 using a TGA Q500 (TA instruments). Samples loaded into a tared platinum pan just prior to  
185 measurement were subjected to a temperature ramp at  $5^{\circ}\text{C}$  per minute from ambient to  $550^{\circ}\text{C}$  in a  
186 flowing nitrogen atmosphere (100ml/min). The gas was switched to air at  $550^{\circ}\text{C}$  (100 ml/min) and

187 heat was continued at the rate of 5°C/min to 730°C. Data was analysed using Universal Analysis  
188 software (TA Instruments).

189

### 190 Polyvinyl alcohol (PVA) extraction and Fourier transform infrared spectroscopy

191 A 500 mm X 27 mm piece of glass fibre (S14) was dissolved in 100 mL of ultrapure water by stirring  
192 and heating at 90 °C for 48 hours. The suspension was filtered through a 0.2 µm filter and the filtrate  
193 was freeze dried (Virtis AdVantage 2.0, SP Scientific) to a white amorphous material. This residue  
194 was subjected to single reflection attenuated total reflection (MIRAacle™, Pike Technologies)  
195 Fourier transform infrared spectroscopy ATR-FTIR (Tensor 37, Bruker) equipped with nitrogen-  
196 cooled mercury cadmium telluride detector.

197 To obtain a spectrum of the sample, an average of 64 interferograms was collected at a resolution of  
198 4 cm<sup>-1</sup> in the wavelength range from 4000 cm<sup>-1</sup> to 750 cm<sup>-1</sup> and blank subtracted.

199 Spectra were analysed using OPUS 6.5 software (Bruker) and compared with RMIT University's  
200 spectral library of organic compounds generated using Spectrum 10 software (Perkin Elmer).

201 Fingerprint spectra shown in Figure 4D were prepared using GraphPad Prism.

202

### 203 Dynamic light scattering (DLS)

204 The molecular weight of the PVA binder present on the glass fibre matrix (S14) was estimated by  
205 DLS. PVA was extracted and freeze-dried as described above. Solutions of this extracted sample and  
206 standards of known polymer size were prepared in water to the concentration of approximately 1.3  
207 mg/mL and passed through 0.22 µm and 300 kDa molecular weight cut-off filters. The sample was  
208 then concentrated approximately five-fold from 4mL to 0.75 mL using a 3KDa MWCO filter (Vivaspin,  
209 GE). Zetasizer Nano ZS and DTS software (Malvern Instruments) was used for measurement of  
210 hydrodynamic diameter based on size distribution by volume. Independent duplicate preparations  
211 of all standards and samples were tested. GraphPad Prism was used to generate a standard curve

212 plotted between measured hydrodynamic diameter and known average molecular weight (KDa) to  
213 interpolate size of the PVA in the extract.

## 214 Nuclear magnetic resonance (NMR) spectroscopy

215 The degree of hydrolysis of the PVA binder present on the glass fibre matrix (S14) was estimated by  
216 <sup>1</sup>H NMR measurement as the intensity of the peak attributable to the acetyl group present in non-  
217 hydrolysed PVA. A 5 mg/mL aqueous solution of PVA extracted from the glass fibre sample (S14) was  
218 prepared in deuterium oxide. Reference spectra for PVA with varying degrees of hydrolysis were  
219 obtained by mixing >99% hydrolysed PVA and 80% hydrolysed PVA in appropriate proportions to  
220 produce standards containing c. 0%, 2%, 5%, 10% and 20% acetyl groups, again at 5 mg/mL in  
221 deuterium oxide. An AVIII 700 instrument (Bruker Biospin) was used to generate <sup>1</sup>H 1D spectra  
222 (employing a quantitative 1D NOESY (Nuclear Overhauser Effect Spectroscopy) presaturation  
223 sequence with recovery delay  $d_1 = 30$ s) and 2D <sup>1</sup>H-<sup>13</sup>C HSQC (heteronuclear single quantum  
224 coherence spectroscopy) plots.

## 225 Application of PVA to matrices

226 Aqueous solutions of each type of PVA to be investigated were prepared at 10 mg/mL. Matrices  
227 were cut into approximately 100 mm<sup>2</sup> pieces and loaded with until the matrices were saturated by  
228 the solution and air-dried overnight. The polyamide matrix (33100L) required surface modification  
229 by washing in 100% ethanol for 20 minutes and air drying before PVA could be loaded. Following  
230 PVA application, vaccines were dried on the matrices and thermostability assessed as described  
231 above.

## 232 Study of physical characteristics of matrices

233 The physical characteristics of matrices were studied using NWSPs (Nonwoven Standard Procedures)  
234 prescribed by the EDANA, the international trade association for the nonwoven industry.

235 Areal density was measured as ratio of mass in grams and area in square metres according to EDANA  
236 NWSP 130.1R0 (15).

237 Matrix thickness was measured at an applied pressure of 0.5 kPa according to EDANA NWSP  
238 120.1.R0 (15) using a thickness tester (ProGage, Thwing-Albert Instrument Company).

239 Fibre length was measured based on 60 individual fibres extracted from the matrix using a Leica MD  
240 G41 optical microscope in transmission mode and Image J software.

241 Minimum mean and maximum pore size were obtained using a POROLUX 100 Automated Capillary  
242 Flow Porometer using Galpore liquid of surface tension 15.6 mN·m<sup>-1</sup>. A total of five measurements  
243 were taken per sample. Porosity ( $\epsilon$ ) of the GE S-14 was determined by the equation  $\epsilon = (1 - \phi) \times 100 \%$   
244 where  $\phi$  is the volume fraction measured as a ratio of bulk matrix density to bulk fibre density.

245 The surface tension of aqueous sugar solution on the matrix was measured on a Kruss K100  
246 tensiometer using the Wilhelmy plate method in which the force exerted on a suspended plate  
247 when it touches the surface of a liquid is related to the surface tension and the contact angle  
248 according to the equation  $\sigma = \frac{F}{L \cdot \cos\theta}$  where  $\sigma$ = surface tension of the liquid, F=measured force,  
249 L=wetted length, and  $\theta$ =contact angle.

250 Wettability was evaluated using the Washburn method, again on a Kruss K100 tensiometer. The rate  
251 of mass uptake when the porous substrate (matrix) comes in to contact with a liquid was used to  
252 determine the capillary constant of the substrate by applying the Washburn equation  $\frac{m^2}{t} = \frac{c \cdot \rho^2 \cos\theta}{\eta}$ ,  
253 where m=mass, t=flow time, c=capillary constant of the nonwoven,  $\rho$ =density of the liquid,  $\sigma$ =  
254 surface tension of the liquid,  $\theta$ =contact angle,  $\eta$ =viscosity of the liquid. The capillary constant of the  
255 matrix was determined using n-hexane which has a contact angle of 0°.

## 256 Development of Nonwoven Fabrics for Vaccine Thermostabilisation

257 A glass fibre matrix (Figure 5B) was custom made by a wet-lay process using commercially available  
258 glass fibre and polyvinyl alcohol aiming for similar porosity, thickness, areal density and wetting  
259 behaviour as the glass fibre sample (S14). A matrix of glass fibre type 475 with diameter 4  $\mu\text{m}$  (Johns  
260 Manville) was prepared and 1 g/L PVA solution (>99% hydrolysed, Mw 146000-186000 kDa, Sigma)  
261 was applied to each side using a spray gun before drying at 110°C for 15 minutes.

262

## 263 Results

### 264 Glass fibre matrix achieves good stability but is not suitable for clinical

#### 265 development

266 In our previously published work, we had used low vaccine doses ( $1.1 \times 10^{10}$  viral particles per  
267 matrix, as compared to a typical human dose of  $5 \times 10^{10}$  viral particles), applied to the glass fibre  
268 matrix 'Standard 14' (S14, GE Healthcare, Figure 1A) <sup>26</sup>. We speculate that the fibrous matrix  
269 provides a high surface area, favouring relatively rapid drying of the product despite the gentle  
270 conditions used (18-24 hours at 20-23 °C and atmospheric pressure). The process results in films of  
271 vitreous 'sugar glass' embedded in the matrix (Figure 1B). As previously reported, this 'base-case'  
272 process achieves a sugar glass transition temperature ( $T_g$ ) after drying of 47-55°C, with moisture  
273 content 3-5% of total solute dry weight <sup>26</sup>.

274 We have now dried full human doses ( $5 \times 10^{10}$  virus particles, approximately  $5 \times 10^8$  infectious units  
275 [IU]) of a simian adenovirus vectored rabies vaccine (ChAdOx2 RabG) upon 1 cm<sup>2</sup> of the matrix, with  
276 <0.1 log<sub>10</sub>-fold loss in-process (i.e. during desiccation) and approximately 0.3 log<sub>10</sub>-fold loss after  
277 thermochallenge at 30°C for a month (Figure 1C) <sup>28</sup>. For explanation of the log<sub>10</sub>-fold loss metric,  
278 please see Methods.

279 Despite the good thermostabilisation performance of the glass fibre matrix, concerns were raised  
280 regarding the brittleness of glass fibre would result in shedding of fibres during the process of  
281 vaccine reconstitution. Indeed, macroscopic damage to the matrix was sometimes apparent at the  
282 point of reconstitution. We therefore sought to quantify subvisible particles (0.1-100 micron) in the  
283 reconstituted vaccine. Application of a pharmacopoeial light microscopy method revealed numerous  
284 glass fibres (Figure 1D). Although passing the reconstituted solution through a 5 µm filter needle  
285 removed virtually all detectable glass particles, reducing the particulate burden within  
286 pharmacopoeial limits, such a method is unsuitable for clinical development, with the possible  
287 exception of very early-phase studies <sup>31</sup>.

## 288 Selection of commercially-available matrices for evaluation

289 In our previously published work, we reported that the S14 matrix achieved better vaccine  
290 thermostability than an alternative commercially-available polypropylene-based matrix (HDC®II J200,  
291 Pall Corporation). We therefore sought to identify alternative commercially-available matrices which  
292 might offer thermostability equivalent to or better than that achieved with S14, but without the  
293 problem of shedding of non-biocompatible fibres. A set of seven matrices were selected based on  
294 manufacturers' product specifications claiming low fibre shedding, low chemical leaching and  
295 compatibility with sterilisation either by dry heat, steam or gamma-radiation sterilisation (Table 1).  
296 Henceforth matrices are referred to, for clarity of identification, in terms of their fibre material and  
297 the manufacturer's product name.

298 We initially screened all matrices for suitable loading capacity ( $>20 \mu\text{L}$  of deionised water/cm<sup>2</sup>).  
299 Matrices which did not absorb  $20 \mu\text{L}/\text{cm}^2$  (without visible remaining beads of water within two  
300 seconds) were re-tested after treatment with 2% polysorbate 20 solution. Matrices which did not  
301 absorb  $20 \mu\text{L}/\text{cm}^2$  after detergent treatment were not studied further. We proceeded to further  
302 study of the remaining five matrices along with the two previously tested matrices (glass fibre S14  
303 and polypropylene J200).

304 The architecture of the selected matrices was characterised by scanning electron microscopy (Figure  
305 2). Fibre diameters estimated for each matrix type using Image J analysis are presented in table 1.

306 Fibres in the polypropylene (J200) matrix (Fig 2A) and glass fibre (conjugate pad) matrix (Fig 2F)  
307 shared the straight, rod-like fibre morphology seen in the original glass fibre (S14) matrix (Fig 1A-B)  
308 but had larger fibre diameters of 10 – 20  $\mu\text{m}$  (as compared to 4  $\mu\text{m}$  in the S14 glass fibre sample).  
309 The remaining four matrices (Fig 2B-E) exhibited a greater degree of curl along their length. A film,  
310 potentially a binder, was apparent on the glass fibre matrix (conjugate pad) (Fig 2F). Matrices loaded  
311 with 0.5 M sugar solution and dried at room temperature for 24 hours also showed differences in

312 the distribution of the sugar glass intercalated between the fibres **Error! Reference source not**  
313 **found.**(Figure 2). Distinct films of sugar glass between the fibres were visible on the two glass fibre  
314 matrices, but not in the polyamide (33100L), polyester (leukosorb) or polypropylene (J200) matrices.  
315 The sugar loaded polyester (23100) matrix and cellulose (31 ET CHR) matrices showed a glazing  
316 effect on the fibres, with discrete sugar glass films being apparent.  
317



## 318 **Thermostability of adenovirus vaccine formulated in commercially-available** 319 **matrices**

320 Adenovirus vaccine vectors were formulated in 0.5M TS and dried on the five selected 'new'  
321 matrices, with glass fibre (S14) and polypropylene (J200) matrices as comparators of known  
322 performance. Dried matrices were thermo-challenged for a week at 45°C prior to reconstitution and  
323 infectivity titration. Marked thermostabilisation performance differences between the matrices  
324 were apparent (Table 1).

325 As previously observed, the glass-fibre matrix (S14) showed minimal (less than 0.3 log<sub>10</sub>-fold) loss of  
326 infectivity compared to the -80 °C stored positive control. None of the alternative matrices matched  
327 this level of performance: the next-best-performing matrices were polyamide (33100L) and glass  
328 fibre (conjugate pad), with infectivity loss of 0.9 log<sub>10</sub>-fold in each. The cellulose-based matrix (GE)  
329 performed most poorly.

330

## 331 **Relationships between matrix type, thermostabilisation performance and** 332 **physical characteristics of sugar glass**

333 In order to understand the highly variable thermostabilisation performance of the matrices, we  
334 investigated whether performance could be correlated with the physical properties of the matrices  
335 or the sugar glass formed.

336 Standard sugar formulation (0.5M trehalose sucrose) was loaded into each matrix and dried at room  
337 temperature and < 5% relative humidity. Dried samples were then subjected to modulated  
338 differential scanning calorimetry (DSC) to measure glass transition temperature (T<sub>g</sub>) onset  
339 temperature and enthalpic recovery of the sugar glass formed on the matrices. The glass transition  
340 temperature (T<sub>g</sub>) indicates the temperature at which a low mobility sugar glass changes to a highly  
341 mobile rubbery state and is known to be related to product stability in dry formulations<sup>32</sup>. Enthalpic  
342 recovery is a measure of energy dissipated as a glass progresses through equilibrium and can reflect  
343 molecular rearrangement during storage or physical ageing<sup>33</sup>.

344 The  $T_g$  was similar for all matrices, observed over a narrow range between 52°C and 56°C, and did  
345 not correlate with thermostability (Figure 3A). A possible correlation was observed between  
346 thermostabilisation performance and high enthalpic recovery (Figure 3B,  $r^2=-0.70$ ,  $p=0.02$ ), as seen  
347 with glass fibre matrices conjugate pad and S14 followed by polypropylene (J200) based matrix.  
348 There was substantial variation in the residual moisture content of products dried under the same  
349 conditions on different matrices (Figure 3C), with lowest residual moisture in the best performing  
350 matrix, S14. Recovery of a model protein (lysozyme) after desiccation and reconstitution did not  
351 predict thermostabilisation performance (Figure 3D).

352

### 353 [Characterisation of S14 glass fibre matrix](#)

354 Given our inability to identify a commercially-available matrix suitable for clinical application, we  
355 turned our attention to detailed characterisation of the best-performing S14 matrix, with a view to  
356 future production of a similar matrix from biocompatible materials.

357 We initially performed a more extensive characterisation of the physical properties of the matrix,  
358 with results as shown in Table 2.

359 Use of chemical binders is common in the production of nonwoven fabrics such as S14 to provide  
360 strength and desirable surface properties. In view of the possibility that a binder might be  
361 contributing to S14's thermostabilisation performance, we investigated whether such a binder could  
362 be identified in the matrix.

363 Scanning electron microscopy demonstrated film-like material which could represent binder  
364 covering fibres in some sections of the S14 sample (Figure 4A). Differential scanning calorimetry and  
365 thermogravimetric analysis (Figures 4B-C) demonstrated the presence of a material with a melting  
366 point of 220°C and a degradation temperature at 260°C.

367 For further characterisation, the binder was extracted in liquid and freeze dried. Fourier transform  
368 infrared (FTIR) spectroscopy of the extract provided a fingerprint spectrum, which matched closely  
369 with the expected spectrum of polyvinyl alcohol (PVA) (Figure 4D) <sup>34,35</sup>.

370 The solubility and other properties of PVA vary widely according to molecular weight (MW) and  
371 degree of hydrolysis, and so we sought to further characterise the presumed PVA extracted from  
372 S14. We used dynamic light scattering (DLS) to compare the hydrodynamic radius of the PVA extract  
373 to those of PVA samples of known MW. The results were consistent with a MW in the range of 35  
374 kDa (Figure 4E).

375 We then used <sup>1</sup>H NMR to estimate the degree of hydrolysis of the polymer. The <sup>1</sup>H NMR spectrum  
376 obtained (Figure 4F) was consistent with PVA, with a 2:1 ratio of the areas under the peaks at ~1.6  
377 ppm and 3.9 ppm (corresponding to hydrogens in the CH<sub>2</sub> and CH environments respectively).  
378 Results obtained using a range of standards of varying percentage hydrolysis showed a clear  
379 relationship of the size of a peak at 2.05 ppm to the acetyl group content (the presence of which, in  
380 a sample of PVA, indicates incomplete hydrolysis). The spectra of the completely hydrolysed  
381 standard and the S14 extract were similar, with only a trace of a peak in this area, and so we  
382 concluded that the PVA extracted from S14 is likely to be completely hydrolysed.

383

### 384 **PVA enhances adenovirus stabilisation by SMT**

385 Having identified PVA in the best-performing matrix, S14, we investigated whether the PVA may  
386 function not only as a binder but might actually contribute to vaccine thermostabilisation.

387 We reasoned that treatment with PVA might enhance the thermostabilisation performance of  
388 relatively poorly-thermostabilising matrices. We observed that application of PVA extracted from  
389 glass fibre (S14) significantly improved thermostabilisation performance of two of the three tested  
390 matrices, as assessed by infectious virus recovery after a four week 45 °C thermochallenge. Recovery  
391 from the polyester matrix (Leukosorb) was enhanced by 1.3 log<sub>10</sub>-fold, while enhancement from the

392 cellulose matrix (ET CHR) was enhanced by 2 log<sub>10</sub>-fold (Figure 5A). Addition of PVA to a glass fibre  
393 matrix (Pall's conjugate pad) was not beneficial. This matrix already contains a binder (Fig 2F),  
394 possibly PVA.

395 We proceeded to test whether the degree of hydrolysis of PVA had any impact on vaccine  
396 thermostability at 45°C for an extended period of 28 days. We tested polyester (Leukosorb),  
397 polyamide (33100L) and a custom-made glass fibre-based matrix after treatment with PVA extracted  
398 from S14 and two other commercially sourced polymers (Sigma) which were similar in size but  
399 differed in degree of hydrolysis (30-70 KDa / 87-90% hydrolysed, and 31-50 KDa/ >99% hydrolysed).  
400 We again observed substantial improvements in thermostabilisation performance, exceeding a 1  
401 log<sub>10</sub>-fold increase in infectious virus recovery after thermochallenge, when PVA was applied to  
402 matrices which did not contain PVA at baseline (polyamide and polyester) (Figure 5B). The greatest  
403 enhancement was seen with the S14 extract, followed by the fully hydrolysed PVA, with the least  
404 enhancement seen with the incompletely hydrolysed PVA (Figure 5B).

405

## 406 [Towards development of custom nonwoven fabrics for vaccine](#)

### 407 [thermostabilisation](#)

408 Having characterised the geometry and composition of S14, and the contribution of PVA to its  
409 thermostabilisation performance, we proceeded to develop a bespoke matrix 'in-house'. Although  
410 our ultimate aim is to produce biocompatible matrices, we sought as an initial step to test whether  
411 the understanding we had gained would enable us to produce an 'in-house' wet-laid glass fibre  
412 matrix which could replicate S14's thermostabilisation performance. The new matrix had structural  
413 properties similar to those of S14 (area density 50.6±1.5 g.m<sup>-2</sup>, thickness 0.56±0.02 mm, mean flow  
414 pores 25±2.3 µm, absorption capacity 11.1±0.3 g/g, composed of borosilicate glass fibres with  
415 diameter 3.6±1.8 and length 1.3±0.6 mm; see table 2 for data relating to S14), and a similar  
416 appearance (Figure 5C). Although thermostabilisation performance of the custom-made matrix did

417 not exactly match that of S14 (Figure 5D), it was closer than had previously been achieved with any  
418 of the other tested matrices (Fig 5B). As expected, further modification of the matrix with additional  
419 PVA had no effect.

## 420 Discussion

421 The starting point for the present study was the observation, in our previous work, that the non-  
422 biocompatible glass-based S14 matrix out-performed a polypropylene matrix <sup>26</sup>. This posed the  
423 question of which properties of the matrix could be relevant for SMT performance, and whether a  
424 more suitable matrix than S14 could be identified for clinical translation.

425 Our initial attempts to find a suitable commercially available matrix yielded disappointing results.  
426 Adenovirus stability on the tested matrices was poor (table 1). Multiple variables differed between  
427 each matrix, and we were therefore unable to perform experiments to clearly isolate the effect of a  
428 single variable. There was not a clear relationship between characteristics of the matrices and their  
429 stabilisation performance (Figures 2 and 3), with the possible exception of high enthalpic recovery of  
430 sugar glass (which is not a parameter which can readily be 'designed in' to a new matrix).

431 Our ability to use analysis of commercially available matrices to draw conclusions to guide design of  
432 new biocompatible matrices was thus limited. We therefore changed our strategy, seeking to  
433 characterise S14 in detail and produce similar matrices 'in-house', allowing us to identify features of  
434 S14 contributing to its stabilising performance.

435 Most significantly we found that PVA, present on the S14 matrix as a binder, appears to contribute  
436 to the stability of adenovirus (Figures 4 and 5). It was shown that fully hydrolysed PVA, similar to  
437 that we extracted from S14, was most beneficial in thermostabilisation (Figure 5). Polyvinyl alcohol is  
438 potentially suitable for use as an excipient in vaccine formulations: it is 'generally regarded as safe'  
439 (GRAS) and is also a FDA approved inactive ingredient for parenteral use <sup>36</sup>. PVA has previously been  
440 explored as an excipient in a number of studies of bio-macromolecular stability. It has been found to

441 be beneficial in some formulations of proteins, including insulin <sup>37</sup>, but benefit has not been seen  
442 consistently in other studies <sup>38 39 40</sup>. PVA may contribute to protein stability by hydrogen bonding of  
443 hydroxyl groups in PVA to the proteins. In dried protein formulations, PVA has also been shown to  
444 prevent deamidation more potently than another widely used polymeric excipient, polyvinyl  
445 pyrrolidone <sup>41</sup>.

446 We now intend to develop the SMT method towards clinical application. There are two principal  
447 obstacles to this goal: robust and GMP compliant execution of the process, and the availability of a  
448 suitable matrix for GMP production. Robustness and GMP compliance of the process are clearly  
449 interlinked. We believe several of the challenges of GMP execution of the SMT process can be  
450 addressed by execution of drying within a lyophilizer without freezing or the application of vacuum:  
451 existing large-scale GMP lyophilisation facilities could provide the necessary controlled temperature,  
452 low humidity, aseptic environment. With respect to robustness, we have found in recent work that  
453 the stability achieved by the process can be highly sensitive to deviations from the intended  
454 conditions and, more troublingly, some unexplained inconsistency in performance can occur: work is  
455 ongoing to address these issues. With respect to the matrix, GMP execution is likely to require  
456 development of a new non-woven. In addition to replicating the stabilising performance of S14, such  
457 a matrix needs to be biocompatible, to have good mechanical integrity (in particular, without  
458 shedding fibres into the reconstituted product), and to be produced in line with the quality  
459 requirements for a GMP raw material. We are now using the data provided by the present study in  
460 order to develop such a matrix, mimicking the physical properties of S14 and making use of the  
461 beneficial effect of PVA, but without the problematic use of glass.

462 [END]

463

## 464 Figure Legends

### 465 Figure 1: SMT on S14 results in thermostable vaccine embedded in sugar glass,

466 Panels A and B show scanning electron micrographs of S14, respectively before and after loading and  
467 drying sugar formulation. In Panel A, the arrangement of fibres in S14 is apparent (200X  
468 magnification, 100  $\mu\text{m}$  scale bar). In panel B, sugar glass films are visible between fibres (main panel  
469 at 200X magnification with 100 $\mu\text{m}$  scale bar, inset at 1000X magnification with 20 $\mu\text{m}$  scale bar).

470 Panel C shows recovery of vaccine from matrix loaded with a human dose of adenovirus, both  
471 immediately post-drying and after thermochallenge at 30 °C for one month. Results plotted illustrate  
472 total virus recovery from each replicate matrix (n=4 for -80 °C comparator, n=2 for post-drying, n=3  
473 for post-thermochallenge), with lines indicating the mean of the replicates. Numbers above each  
474 result show  $\log_{10}$ -fold loss from the -80 °C control.

475 Panel D shows a representative light microscopy image of fibres shed from S14 after vaccine  
476 reconstitution (scale bar 200  $\mu\text{m}$ ).

477

478 **Figure 2: Physical appearance of fibres and sugar glass formed in matrices**

479 Scanning electron microscopy images of six different matrices at 1000X magnification. Within each  
480 panel, the left-hand image shows empty matrices and the right-hand image shows sugar-loaded  
481 fibres. Scale bar shows 20  $\mu\text{m}$  in each image.

482



483 **Figure 3: Physical properties of sugar glass have differential impact on vaccine**  
484 **thermostability**

485 Each panel relates the thermostabilisation performance of the various matrices (after one-week  
486 thermochallenge at 45 °C, Y-axis, data shown in Table 1) to a potentially explanatory variable on the  
487 X-axis: glass transition temperature (Panel A); enthalpic recovery (Panel B); moisture content (Panel  
488 C); and protein recovery (Panel D). Results of Pearson correlation analysis are shown within each  
489 panel. DSC measurements (Panels A and B) were made in singlicate, Karl-Fischer measurements  
490 (Panel C) were made in duplicate, and protein recovery measurements (Panel D) were made in  
491 triplicate. For panels C and D, points represent the mean measurement.

492

## 493 Figure 4: Chemical properties of glass fibre matrix

494 Panel A shows a scanning electron microscopy image indicating presence of binder in glass fibre  
495 (S14), visible as a film in the white-circled area. Scale bar shows 10  $\mu\text{m}$  in each image. Such areas  
496 were relatively sparse, compared to the extensive films apparent in sugar-loaded matrices (Figure  
497 1B).

498 Panel B shows a differential scanning calorimetry thermogram of glass fibre (S14), representative of  
499 duplicate measurements. The graphs show heat flow as a function of temperature during scanning  
500 from 40  $^{\circ}\text{C}$  to 250  $^{\circ}\text{C}$ .

501 Panel C displays thermogravimetric analysis of glass fibre (S14), showing a thermal decomposition  
502 step. Weight losses (green lines) and the rate of weight loss (i.e. derivative,  $\%/^{\circ}\text{C}$ ) (blue lines) are  
503 shown.

504 Panel D shows the sample spectrum obtained from attenuated total reflectance Fourier transform  
505 spectroscopy (ATR-FTIR) for the binder recovered from glass fibre (S14) (black), and a reference  
506 library spectrum for PVA (grey).

507 Panel E shows estimation of the molecular weight of the binder extracted from glass fibre (S14) by  
508 DLS. Points and solid line show a standard curve generated using PVA of known MW. Dashed lines  
509 indicate the hydrodynamic radius of the PVA extracted from S14 (11nm) and the inferred MW (36  
510 kDa). Points and error bars indicate the mean and range respectively of duplicate DLS  
511 measurements.

512 Panel F shows  $^1\text{H}$  NMR spectra used to estimate the percentage hydrolysis of the binder extracted  
513 from glass fibre (S14). The upper spectrum (labelled S14) is that of the extract, with unknown  
514 percentage hydrolysis and hence an unknown percentage of monomers bearing acetyl groups. The  
515 five spectra below were obtained using standards prepared by proportionately mixing 80% and  
516 100% hydrolysed PVA to achieve a range of acetyl group content ranging from  $<0.1\%$  up to 20% (as  
517 per labels to left of panel). The X-axis indicates chemical shift measured in parts per million (ppm)  
518 and the Y-axis shows relative intensity.

519 **Figure 5: PVA improves vaccine thermostability on matrices**

520 A PVA-containing extract prepared from S14 was dried onto various fresh matrices, followed by  
521 drying of vaccine in trehalose-sucrose buffer onto the treated matrices and untreated comparator  
522 matrices. Viable virus recovery was assessed after thermochallenge as indicated for each panel. S14  
523 was included as a comparator in each experiment.

524 Panel A shows loss in infectivity titre of vaccine in the absence (open circles) or presence (solid  
525 circles) of PVA extracted from glass fibre (S14), as compared to -80°C stored liquid control, after one  
526 week at 45 °C. Points indicate individual samples (four replicates per condition).

527 Panel B shows difference in loss in infectivity titre of vaccine loaded in polyester (leukosorb) and  
528 polyamide (33100L) matrix modified by deposition of three different types of PVA prior to  
529 application and drying of vaccine. Dried samples were subjected to thermochallenge for four weeks  
530 at 45 °C. Points indicate individual samples (three replicates per condition).

531 Panel C shows a scanning electron microscope image of the custom-made glass fibre matrix. Scale  
532 bar shows 50 µm.

533 Panel D compares loss in infectivity titre of vaccine post-thermochallenge between standard 14 and  
534 custom-made glass fibre matrix modified by deposition of two different types of PVA prior to  
535 application and drying of vaccine. Dried samples were subjected to thermochallenge for four weeks  
536 at 45°C. Points indicate individual samples (three replicates per condition).

537

## 538 References

- 539 1. Lydon P, Zipursky S, Tevi-Benissan C, Djingarey MH, Gbedonou P, Youssouf BO, Zaffran M.  
540 Economic benefits of keeping vaccines at ambient temperature during mass vaccination: the  
541 case of meningitis A vaccine in Chad. *Bulletin of the World Health Organization* 2014;  
542 92(2):86-92.
- 543 2. Centers for Disease Control and Prevention. Vaccine Storage and Handling Toolkit. U.S.  
544 Department of Health and Human Services (2019).  
545 <https://www.cdc.gov/vaccines/hcp/admin/storage/toolkit/storage-handling-toolkit.pdf>.  
546 Accessed November 27, 2019
- 547 3. Bell KN, Hogue CJ, Manning C, Kendal AP. Risk factors for improper vaccine storage and  
548 handling in private provider offices. *Pediatrics* 2001;107(6):E100.
- 549 4. McColloster PJ. US vaccine refrigeration guidelines: loose links in the cold chain. *Hum Vaccin*  
550 2011;7(5):574-575.
- 551 5. Kristensen D, Chen D, Cummings R. Vaccine stabilization: research, commercialization, and  
552 potential impact. *Vaccine* 2011;29(41):7122-7124.
- 553 6. Chen D, Zehrung D. Desirable attributes of vaccines for deployment in low-resource settings.  
554 *J Pharma Sci* 2013;102(1):29-33.
- 555 7. Walgate R. Gates Foundation picks 14 grand challenges for global disease research. *Bulletin*  
556 *of the World Health Organization* 2003;81(12):915 – 916.
- 557 8. Hill AVS. Pre-erythrocytic malaria vaccines: towards greater efficacy. *Nat Rev Immunol*  
558 2006;6(1):21-32.
- 559 9. Ewer KJ, Sierra-Davidson K, Salman AM, Illingworth JJ, Draper SJ, Biswas S, Hill AVS. Progress  
560 with viral vectored malaria vaccines: A multi-stage approach involving “unnatural immunity”.  
561 *Vaccine* 2015;33(52):7444-7451.

- 562 10. Hanke T, Goonetilleke N, McMichael AJ, Dorrell L. Clinical experience with plasmid DNA- and  
563 modified vaccinia virus Ankara-vectored human immunodeficiency virus type 1 clade A  
564 vaccine focusing on T-cell induction. *J Gen Virol* 2007;88(Pt 1):1-12.
- 565 11. Hanke T. Conserved immunogens in prime-boost strategies for the next-generation HIV-1  
566 vaccines. *Expert Opin Biol Ther* 2014;14(5):601-616.
- 567 12. Sheehan S, Harris SA, Satti I, Hokey DA, Dheenadhayalan V, Stockdale L, Manjaly Thomas ZR,  
568 Minhinnick A, Wilkie M, Vermaak S, Meyer J, O'Shea MK, Pau MG, Versteegen I, Douoguih M,  
569 Hendriks J, Sadoff J, Landry B, Moss P, McShane H. A Phase I, Open-Label Trial, Evaluating  
570 the Safety and Immunogenicity of Candidate Tuberculosis Vaccines AERAS-402 and MVA85A,  
571 Administered by Prime-Boost Regime in BCG-Vaccinated Healthy Adults. *PLOS ONE*  
572 2015;10(11):e0141687.
- 573 13. Rimmelzwaan GF, Sutter G. Candidate influenza vaccines based on recombinant modified  
574 vaccinia virus Ankara. *Expert Rev Vaccines* 2009;8(4):447-454.
- 575 14. Lambe T. Novel viral vectored vaccines for the prevention of influenza. *Mol Med*  
576 2012;18:1153-1160.
- 577 15. Ledgerwood JE, DeZure AD, Stanley DA, Novik L, Enama ME, Berkowitz NM, Hu Z, Joshi G,  
578 Ploquin A, Sitar S, Gordon IJ, Plummer SA, Holman LA, Hendel CS, Yamshchikov G, Roman F,  
579 Nicosia A, Colloca S, Cortese R, Bailer RT, Schwartz RM, Roederer M, Mascola JR, Koup RA,  
580 Sullivan NJ, Graham BS, the VRC 2007 Study Team. Chimpanzee Adenovirus Vector Ebola  
581 Vaccine. *N Engl J Med* 2017;376(10):928-938.
- 582 16. Ewer K, Rampling T, Venkatraman N, Bowyer G, Wright D, Lambe T, Imoukhuede EB, Payne  
583 R, Fehling SK, Strecker T, Biedenkopf N, Krahling V, Tully CM, Edwards NJ, Bentley EM,  
584 Samuel D, Labbe G, Jin J, Gibani M, Minhinnick A, Wilkie M, Poulton I, Lella N, Roberts R,  
585 Hartnell F, Bliss C, Sierra-Davidson K, Powlson J, Berrie E, Tedder R, Roman F, De Ryck I,  
586 Nicosia A, Sullivan NJ, Stanley DA, Mbaya OT, Ledgerwood JE, Schwartz RM, Siani L, Colloca  
587 S, Folgori A, Di Marco S, Cortese R, Wright E, Becker S, Graham BS, Koup RA, Levine MM,

- 588 Volkman A, Chaplin P, Pollard AJ, Draper SJ, Ballou WR, Lawrie A, Gilbert SC, Hill AV. A  
589 Monovalent Chimpanzee Adenovirus Ebola Vaccine Boosted with MVA. *N Engl J Med*  
590 2016;374(17):1635-1646.
- 591 17. Renteria SS, Clemens CC, Croyle MA. Development of a nasal adenovirus-based vaccine:  
592 Effect of concentration and formulation on adenovirus stability and infectious titer during  
593 actuation from two delivery devices. *Vaccine* 2010;28(9):2137-2148.
- 594 18. Evans RK, Nawrocki DK, Isopi LA, Williams DM, Casimiro DR, Chin S, Chen M, Zhu DM, Shiver  
595 JW, Volkin DB. Development of stable liquid formulations for adenovirus-based vaccines. *J*  
596 *Pharm Sci* 2004;93(10):2458-2475.
- 597 19. Kupgan G, Choudhari SP, Flynn NH, Nigatu A, Vupputuri S, Picking WL, Picking WD, Ramsey  
598 JD Identification of Excipients for Stabilizing Fiberless Adenovirus as Biopharmaceuticals. *J*  
599 *Pharm Sci* 2017;106(7):1764-1771.
- 600 20. Chen S, Guo D, Guo B, Liu J, Shen Y, Xu X, Huang W, Guo S. Investigation on formulation and  
601 preparation of adenovirus encoding human endostatin lyophilized powders. *International*  
602 *journal of pharmaceutics* 2012;427(2):145-152.
- 603 21. Stewart M, Ward SJ, Drew J. Use of adenovirus as a model system to illustrate a simple  
604 method using standard equipment and inexpensive excipients to remove live virus  
605 dependence on the cold-chain. *Vaccine* 2014;32(24):2931-2938.
- 606 22. LeClair DA, Cranston ED, Xing Z, Thompson MR. Evaluation of excipients for enhanced  
607 thermal stabilization of a human type 5 adenoviral vector through spray drying. *Int J Pharm*  
608 2016;506(1-2):289-301.
- 609 23. Jin TH, Tsao E, Goudsmit J, Dheenadhayalan V, Sadoff J. Stabilizing formulations for inhalable  
610 powders of an adenovirus 35-vectored tuberculosis (TB) vaccine (AERAS-402). *Vaccine*  
611 2010;28(27):4369-4375.

- 612 24. Afkhami S, LeClair DA, Haddadi S, Lai R, Toniolo SP, Ertl HC, Cranston ED, Thompson MR, Xing  
613 Z. Spray dried human and chimpanzee adenoviral-vectored vaccines are thermally stable and  
614 immunogenic in vivo. *Vaccine* 2017;35(22):2916-2924.
- 615 25. Pearson FE, McNeilly CL, Crichton ML, Primiero CA, Yukiko SR, Fernando GJ, Chen X, Gilbert  
616 SC, Hill AV, Kendall MA. Dry-coated live viral vector vaccines delivered by nanopatch  
617 microprojections retain long-term thermostability and induce transgene-specific T cell  
618 responses in mice. *PLOS ONE* 2013;8(7):e67888.
- 619 26. Alcock R, Cottingham MG, Rollier CS, Furze J, De Costa SD, Hanlon M, Spencer AJ, Honeycutt  
620 JD, Wyllie DH, Gilbert SC, Bregu M, Hill AVS. Long-Term Thermostabilization of Live Poxviral  
621 and Adenoviral Vaccine Vectors at Supraphysiological Temperatures in Carbohydrate Glass.  
622 *Science Transl Med* 2010; 2(19):19ra12-19ra12.
- 623 27. Dulal P, Wright D, Ashfield R, Hill AV, Charleston B, Warimwe GM. Potency of a  
624 thermostabilised chimpanzee adenovirus Rift Valley Fever vaccine in cattle. *Vaccine*  
625 2016;34(20):2296-2298.
- 626 28. Wang C, Dulal P, Zhou X, Xiang Z, Goharriz H, Banyard A, Green N, Brunner L, Ventura R,  
627 Collin N, Draper SJ, Hill AVS, Ashfield R, Fooks AR, Ertl HC, Douglas AD. A simian-adenovirus-  
628 vectored rabies vaccine suitable for thermostabilisation and clinical development for low-  
629 cost single-dose pre-exposure prophylaxis. *PLOS Negl Trop Dis* 2018;12(10):e0006870-  
630 e0006870.
- 631 29. O'Hara GA, Duncan CJA, Ewer KJ, Collins KA, Elias SC, Halstead FD, Goodman AL, Edwards NJ,  
632 Reyes-Sandoval A, Bird P, Rowland R, Sheehy SH, Poulton ID, Hutchings C, Todryk S, Andrews  
633 L, Folgori A, Berrie E, Moyle S, Nicosia A, Colloca S, Cortese R, Siani L, Lawrie AM, Gilbert SC,  
634 Hill AVS. Clinical assessment of a recombinant simian adenovirus ChAd63: a potent new  
635 vaccine vector. *J Infect Dis* 2012;205(5):772-781.
- 636 30. Dicks MD, Spencer AJ, Edwards NJ, Wadell G, Bojang K, Gilbert SC, Hill AV, Cottingham MG  
637 2012. A novel chimpanzee adenovirus vector with low human seroprevalence: improved

- 638 systems for vector derivation and comparative immunogenicity. PLOS ONE  
639 2012;7(7):e40385.
- 640 31. European Medicines Agency. Quality of medicines questions and answers: Part 2.  
641 [https://www.ema.europa.eu/en/human-regulatory/research-development/scientific-](https://www.ema.europa.eu/en/human-regulatory/research-development/scientific-guidelines/qa-quality/quality-medicines-questions-answers-part-2)  
642 [guidelines/qa-quality/quality-medicines-questions-answers-part-2](https://www.ema.europa.eu/en/human-regulatory/research-development/scientific-guidelines/qa-quality/quality-medicines-questions-answers-part-2). Accessed November 27,  
643 2019
- 644 32. Duddu SP, Dal Monte PR. Effect of Glass Transition Temperature on the Stability of  
645 Lyophilized Formulations Containing a Chimeric Therapeutic Monoclonal Antibody. Pharm  
646 Res 1997;14(5):591-595.
- 647 33. Hodge IM. Enthalpy relaxation and recovery in amorphous materials. J Non-Cryst Solids  
648 1994;169(3):211-266.
- 649 34. Mansur HS, Sadahira CM, Souza AN, Mansur AAP. FTIR spectroscopy characterization of poly  
650 (vinyl alcohol) hydrogel with different hydrolysis degree and chemically crosslinked with  
651 glutaraldehyde. Mater Sci Eng C 2008;28(4):539-548.
- 652 35. Krimm S, Liang CY, Sutherland GBBM. Infrared spectra of high polymers. V. Polyvinyl alcohol.  
653 J Polym Sci 1956;22(101):227-247.
- 654 36. U.S. Food and Drug Administration. Inactive Ingredient Search for Approved Drug Products  
655 2016. <https://www.accessdata.fda.gov/scripts/cder/iig/index.cfm>
- 656 37. Rawat S, Gupta P, Kumar A, Garg P, Suri CR, Sahoo DK. Molecular mechanism of poly(vinyl  
657 alcohol) mediated prevention of aggregation and stabilization of insulin in nanoparticles.  
658 Mol Pharm 2015;12(4):1018-1030.
- 659 38. Liao Y-H, Brown MB, Jones SA, Nazir T, Martin GP. The effects of polyvinyl alcohol on the in  
660 vitro stability and delivery of spray-dried protein particles from surfactant-free HFA 134a-  
661 based pressurised metered dose inhalers. Int J Pharm 2005;304(1-2):29-39.



- 662 39. Yoshioka S, Aso Y, Kojima S, Tanimoto T. Effect of polymer excipients on the enzyme activity  
663 of lyophilized bilirubin oxidase and beta-galactosidase formulations. Chemical and  
664 Pharmaceutical Bulletin 2000;48(2):283-285.
- 665 40. Sah H. Stabilization of proteins against methylene chloride/water interface-induced  
666 denaturation and aggregation. J Control Release 1999;58(2):143-151.
- 667 41. Lai MC, Hageman MJ, Schowen RL, Borchardt RT, Topp EM. Chemical stability of peptides in  
668 polymers. 1. Effect of water on peptide deamidation in poly(vinyl alcohol) and poly(vinyl  
669 pyrrolidone) matrixes. J Pharm Sci 1999;88(10):1073-1080.

# Figure 1

**A**

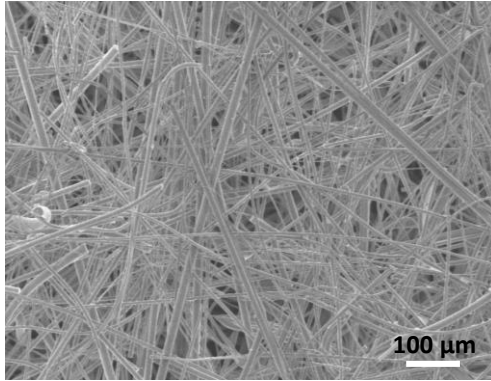

**B**

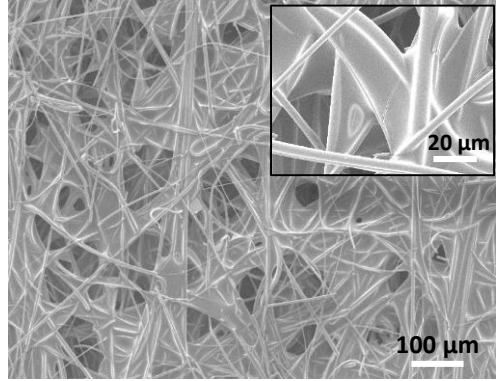

**C**

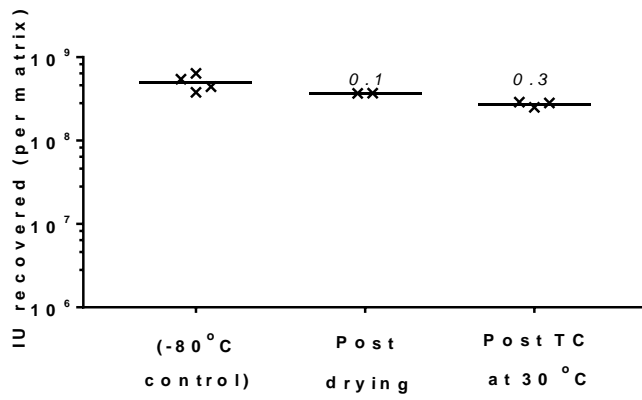

**D**

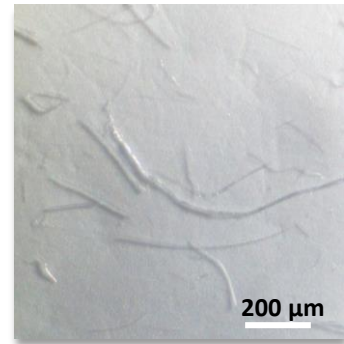

# Figure 2

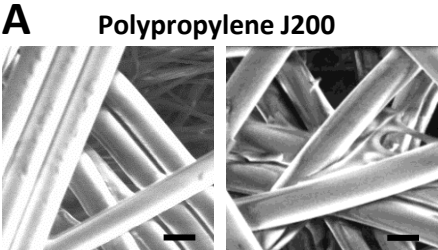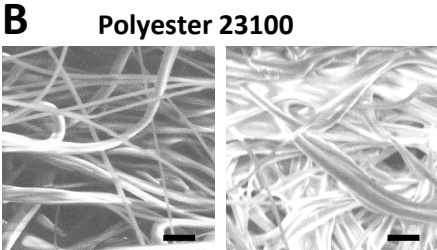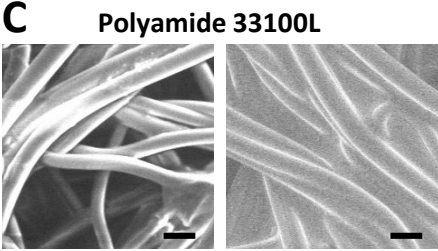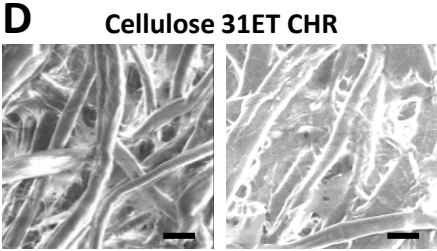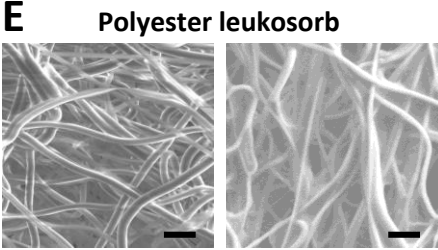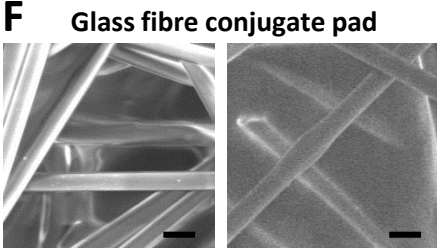

# Figure 3

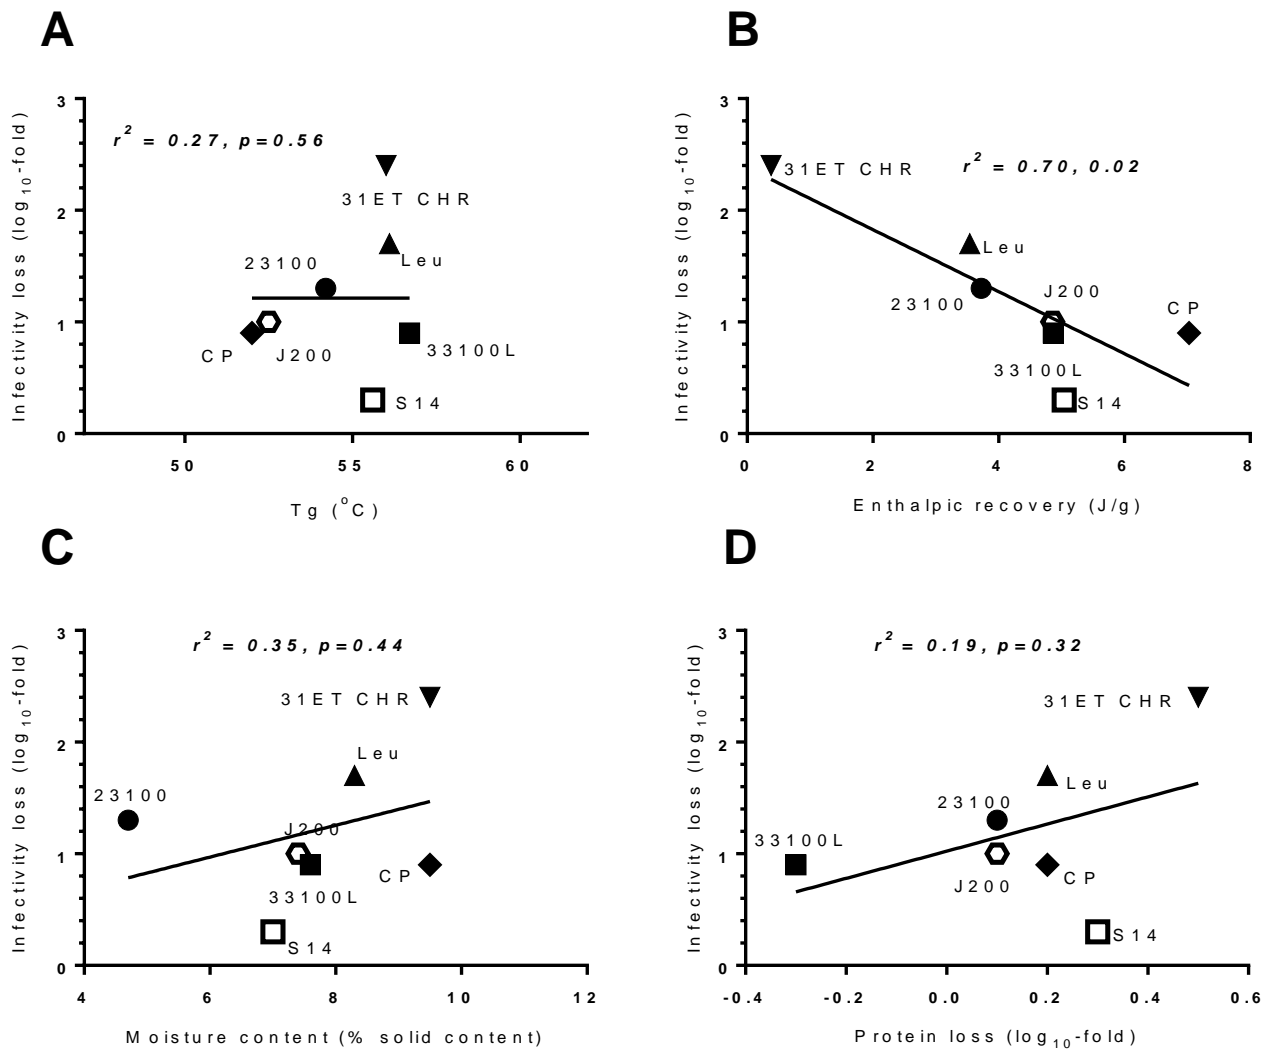

# Figure 4

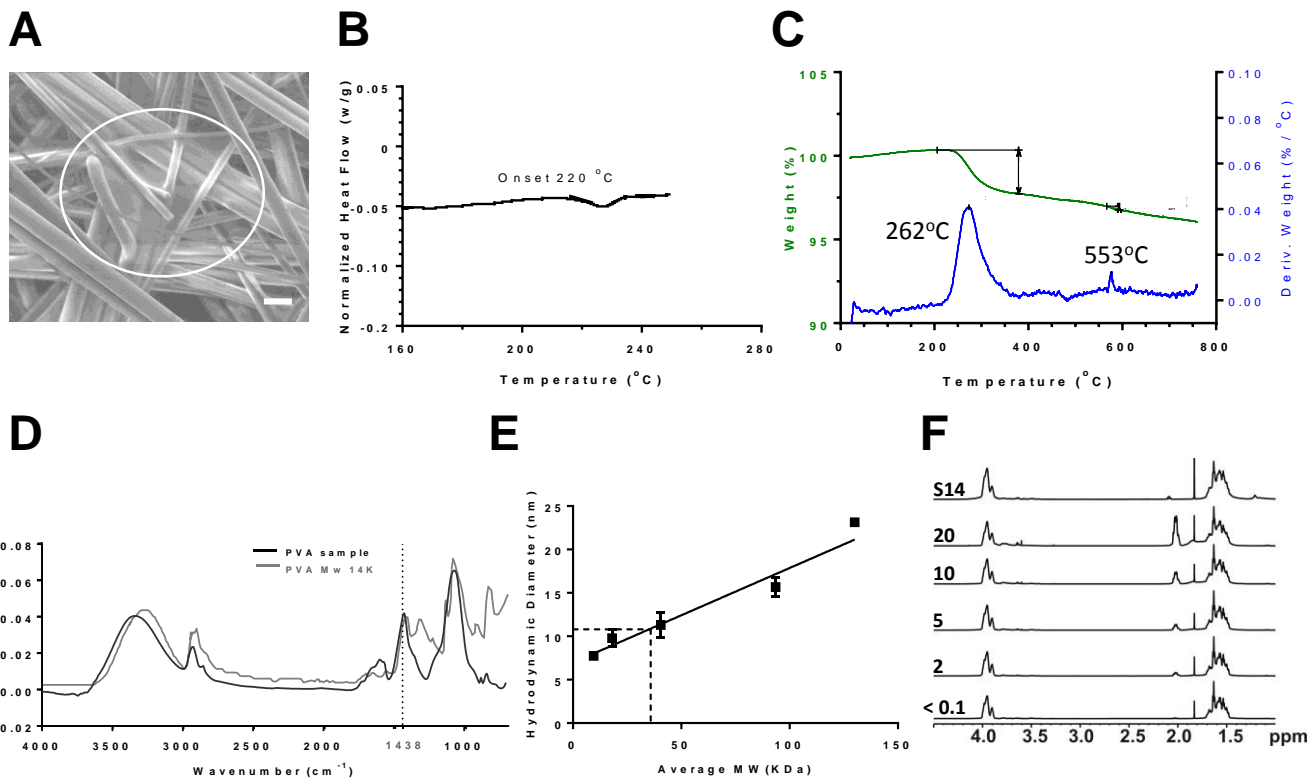

# Figure 5

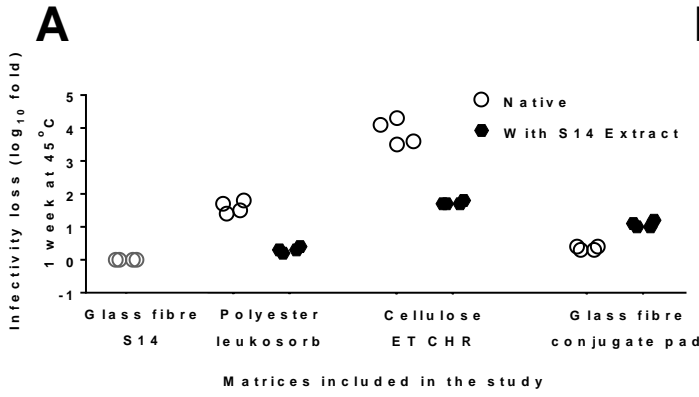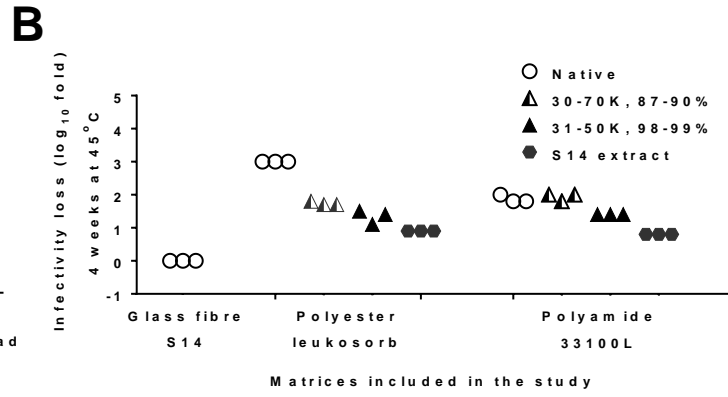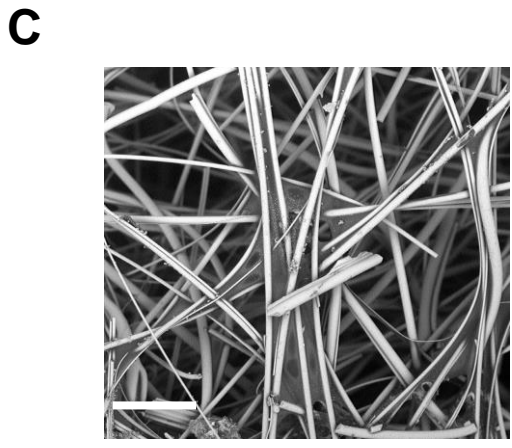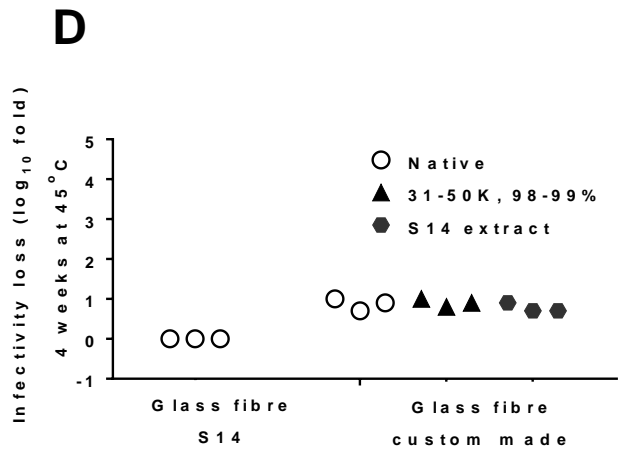

Table 1: Basic characteristics of studied matrices

| Matrix name<br>(manufacturer product<br>reference) | Manufacturer (sub-brand if<br>applicable) | Main material            | PS20 treatment? | Absorption >20 $\mu\text{L}/\text{cm}^2$ H <sub>2</sub> O | Loading capacity<br>( $\mu\text{L}/\text{cm}^2$ ) | Fibre diameter<br>( $\mu\text{m}$ ) $\pm$ SEM | Mean pore size<br>( $\mu\text{m}$ ) | Thermostabilisation<br>performance ( $\log_{10}$ -fold<br>infectivity loss) |
|----------------------------------------------------|-------------------------------------------|--------------------------|-----------------|-----------------------------------------------------------|---------------------------------------------------|-----------------------------------------------|-------------------------------------|-----------------------------------------------------------------------------|
| S 14                                               | GE<br>(Whatman)                           | Glass fibre              | X               | ✓                                                         | 55                                                | 4.2 $\pm$ 0.3                                 | 20                                  | 0.3                                                                         |
| J200                                               | Pall                                      | Polypropylene            | ✓               | ✓                                                         | 36                                                | 21.7 $\pm$ 0.4                                | 20                                  | 1                                                                           |
| 23100                                              | Hollingsworth<br>- Vose                   | Polyester                | ✓               | ✓                                                         | 43                                                | 4.4 $\pm$ 0.4                                 | 11                                  | 1.3                                                                         |
| 33100L                                             | Hollingsworth<br>- Vose                   | Polyamide                | ✓               | ✓                                                         | 36                                                | 4.8 $\pm$ 0.4                                 | 27                                  | 0.9                                                                         |
| Cyclopore<br>(PC)                                  | GE<br>(Whatman)                           | Polycarbonate            | ✓               | X                                                         | Excl.                                             | Excl.                                         | Excl.                               | Excl.                                                                       |
| 31 ET CHR                                          | GE<br>(Whatman)                           | Cellulose                | X               | ✓                                                         | 40                                                | 15.4 $\pm$ 1.0                                | 1.2                                 | 2.4                                                                         |
| Leukosorb<br>(Leu)                                 | Pall                                      | Polyester <sup>a</sup>   | X               | ✓                                                         | 40                                                | 3.5 $\pm$ 0.2                                 | 8                                   | 1.7                                                                         |
| Conjugate<br>pad (CP)                              | Pall                                      | Glass fibre <sup>b</sup> | X               | ✓                                                         | 30                                                | 12.3 $\pm$ 0.4                                | N/A                                 | 0.9                                                                         |
| Asymmetric<br>polysulfone<br>(AS)                  | Pall                                      | Polysulfone              | ✓               | X                                                         | Excl.                                             | Excl.                                         | Excl.                               | Excl.                                                                       |

Loading capacity was measured by weight measurement of matrices before and after full impregnation in water. Fibre diameter was measured using Image J from SEM micrograph images. Mean pore size are as provided in suppliers' specification (in one case N/A denotes data not available). Thermostabilisation performance presented is loss of infectivity after vaccine drying and thermochallenge for 1 week at 45 °C. Excl. denotes matrices excluded from further analysis on basis of loading capacity.

<sup>a</sup> Proprietary composition, but macroscopic, microscopic and FTIR spectrum appearances are consistent with polyester (data not shown); this matrix is henceforth referred to as polyester

<sup>b</sup> Henceforth referred to as 'glass fibre (conjugate pad)' for avoidance of confusion with S14.

Table 2: Physical characteristics of the glass fibre (S14) matrix

| <b>PARAMETER (unit)</b>                                                | <b>Mean</b>          | <b>Standard deviation</b> |
|------------------------------------------------------------------------|----------------------|---------------------------|
| <b>Area density [g.m<sup>-2</sup>]</b>                                 | 55.1                 | 1.8                       |
| <b>Thickness [mm]</b>                                                  | 0.5                  | 0.04                      |
| <b>Fibre diameter [μm]</b>                                             | 3.4                  | 1.8                       |
| <b>Fibre length [mm]</b>                                               | 4.4                  | 1.5                       |
| <b>Largest pore diameter [μm]</b>                                      | 133.0                | 99.4                      |
| <b>Mean flow pore diameter [μm]</b>                                    | 22.3                 | 0.5                       |
| <b>Smallest pore diameter [μm]</b>                                     | 6.4                  | 1.5                       |
| <b>Porosity [%]</b>                                                    | 95                   |                           |
| <b>Capillary constant [cm<sup>5</sup>]</b>                             | 7.7X10 <sup>-7</sup> | 5.6X10 <sup>-8</sup>      |
|                                                                        |                      |                           |
| <b>Thermostabilisation buffer contact angle [°]</b>                    | 30.9                 | 4.9                       |
| <b>Thermostabilisation buffer surface tension[(mN.m<sup>-1</sup>)]</b> | 63.9                 | 0.3                       |
